# Supplementary material for: A FACS-based screening strategy to assess sequence-specific RNA-binding of Pumilio protein variants in E. coli
Source: publisher site journal article supplement (doi:10.1515/hsz-2016-0214), 2016-09-28
Supplement: Supplementary file 1 [file hsz-2016-0214_suppl.docx]

**Supplementary Information**


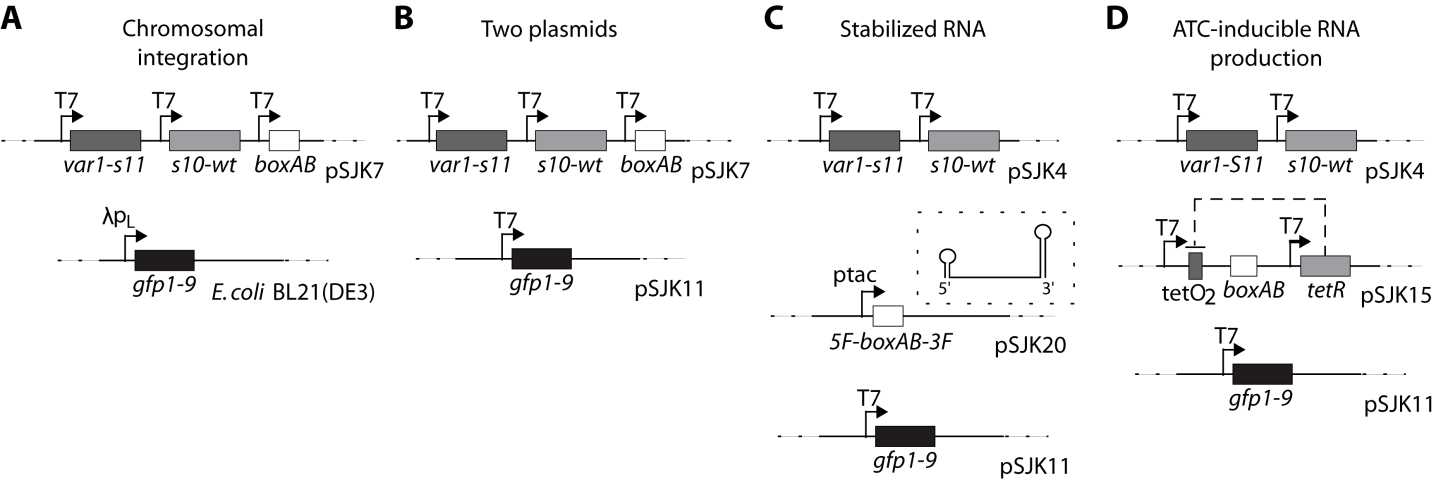


**Figure S1: Alternative setups to introduce TetFC into *E. coli*. (A)** Chromosomal Integration. In addition to pSJK7 (for producing fusion proteins S10-WT, Var1-S11 and target RNA boxAB under control of three T7 promoters), *gfp1-9* was inserted into the chromosome of *E. coli* BL21(DE3) and placed under control of the constitutive promoter *λ*pL. **(B)** Two plasmids. A high copy number plasmid was used for *gfp1-9* under control of a T7 promoter (pSJK11) in addition to a plasmid containing *var1-S11*, *S10-WT* and *boxAB* under the control of three individual T7 promoters (pSJK7). **(C)** Stabilized RNA. A separate plasmid was used for production of target RNA boxAB under control of a p*tac* promoter (pSJK20). For stabilization, boxAB was flanked by two stem loops. Genes coding for Pumilio fusion proteins were placed under the control of two T7 promoters in plasmid pSJK4. **(D)** Schematic of an expression system in *E. coli* with target RNA production decoupled from recombinant protein production. GFP1-9 was encoded on a pUC plasmid derivative (pSJK11), pACYCDuet-1 was used for fusion proteins Var1-S11 and S10-WT (pSJK4) and pRSDuet-1 was chosen for the target RNA boxAB (pSJK15). For independent production of boxAB, a TetR/tetracycline system was used. Genes *tetR*, as well as *var1-S11*, *S10-wt* and *gfp1-9* were placed under the control of four T7 promoters. For plasmid pSJK15, two TetR binding sites (tetO2) were added between the first T7 promoter and *boxAB*.


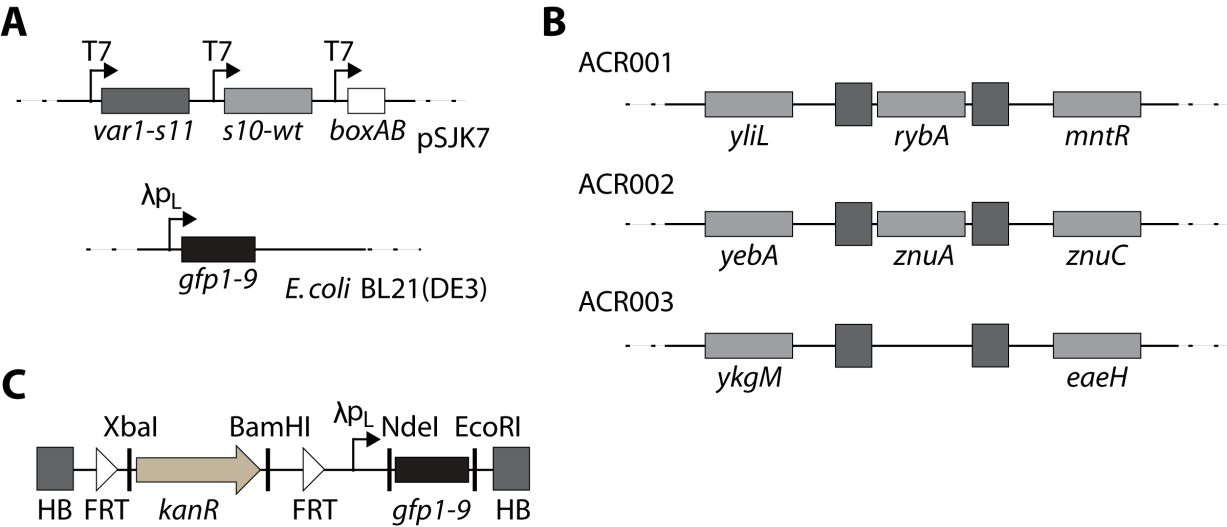


**Figure S2: Strategy for chromosomal integration of *gfp1-9*. (A)** Overview of the expression system. pSJK7, a pACYCDuet-1 derived plasmid, was chosen for production of fusion proteins S10-WT and Var1-S11 as well as target RNA boxAB under control of three T7 promoters. **(B)** Integration sites for *gfp1-9* and names of respective strains. Light grey boxes represent respective genes of the *E. coli* BL21(DE3) genome, dark grey boxes indicate regions used for homologous recombination. **(C)** Cloning cassette for homologous recombination. *gfp1-9* (black square) was placed under control of the constitutive promoter *λ*pL. A kanamycin resistance gene (*kanR*, brown arrow) was used for selection of positive clones and is flanked by two flippase recognition target (FRT, white triangle) sites. Various restriction sites (XbaI, BamHI, NdeI, EcoRI) were placed within the cassette. Homologous regions (HB, grey squares) were added using PCR and are as indicated in (B).

**
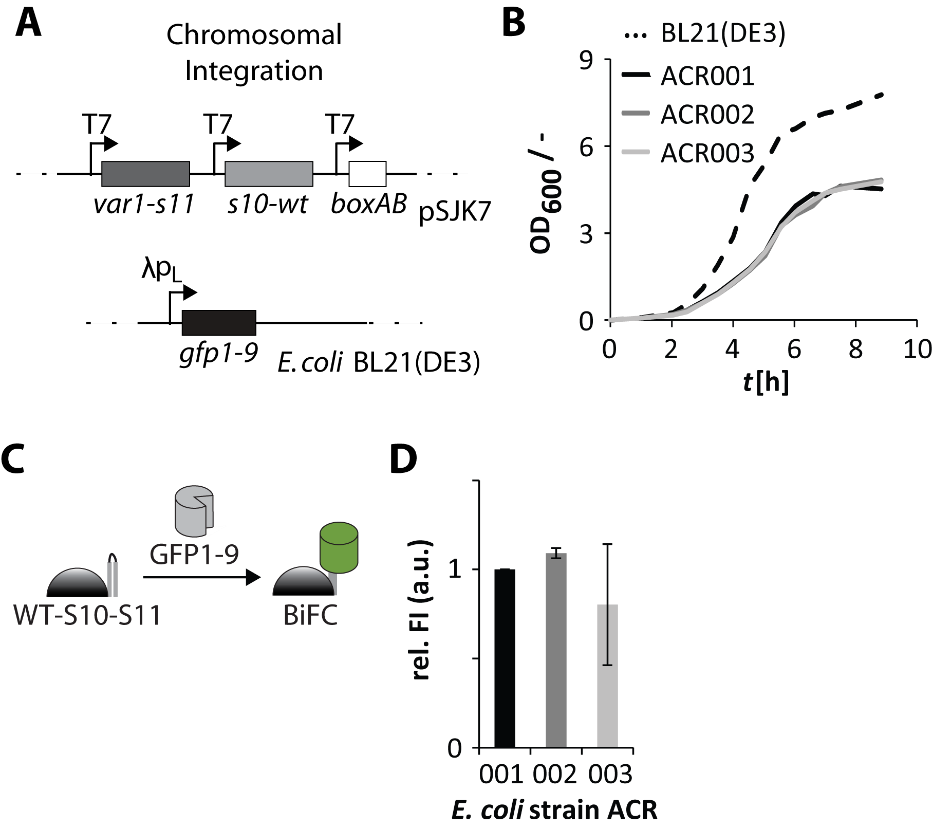
**

**Figure S3: Chromosomal integration of *gfp1-9*. (A)** Overview of the expression system. pSJK7, a pACYCDuet-1 derived plasmid, was chosen for production of fusion proteins S10-WT and Var1-S11 as well as target RNA boxAB under control of three T7 promoters. **(B)** Growth curves of *E. coli* ACR001 (black line), ACR002 (dark grey line) and ACR003 (light grey line) cells, which contain *gfp1-9* under control of promoter *λ*pL as indicated in figure S2. As control *E. coli* BL21(DE3) cells without the gene cassette were used (dashed line). **(C)** Schematic overview of the RNA-independent bimolecular fluorescence complementation (BiFC) using Pum-S10-S11 as an indirect reporter of soluble, untagged GFP1-9. **(D)** BiFC with GFP1-9 from *E. coli* ACR001, ACR002, and ACR003 cell lysate with Pum-S10-S11. Average values from two independent experiments and range error bars are shown.


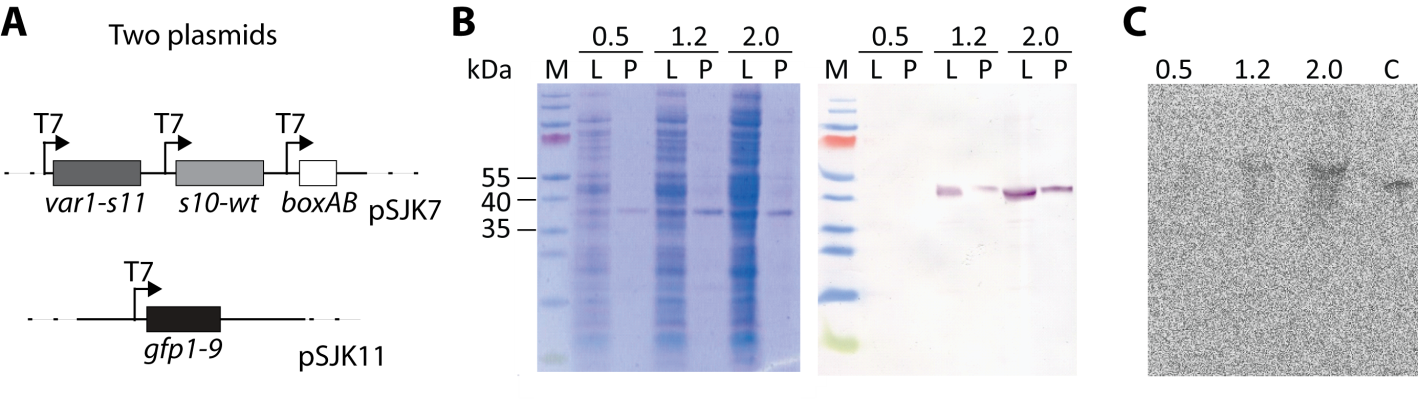


**Figure S4: Validation of *in vivo* production of TetFC fusion proteins and target RNA.** *E. coli* BL21(DE3) pSJK7 cells were harvested at different optical densities (OD600 = 0.5, 1.2, 2.0). IPTG (0.16 mM) was added to samples (1.2) and (2.0) at OD600 = 0.4. **(A)** Overview of the expression system. A high copy number plasmid was used for *gfp1-9* under control of a T7 promoter (pSJK11) in addition to a plasmid containing *var1-S11*, *S10-WT* and *boxAB* under the control of individual T7 promoters (pSJK7). **(B)** Cells were analyzed after recombinant protein production using SDS-PAGE and Coomassie-staining (left) and Western blot using anti-his antibody (right). (M) Marker PageRulerTM Prestained Protein Ladder, (L) cell lysate, (P) insoluble proteins. **(C)** Northern blot with total RNA isolated at different optical densities and radioactively labeled boxAB probe. (C) Control oligonucleotide (127 nt).


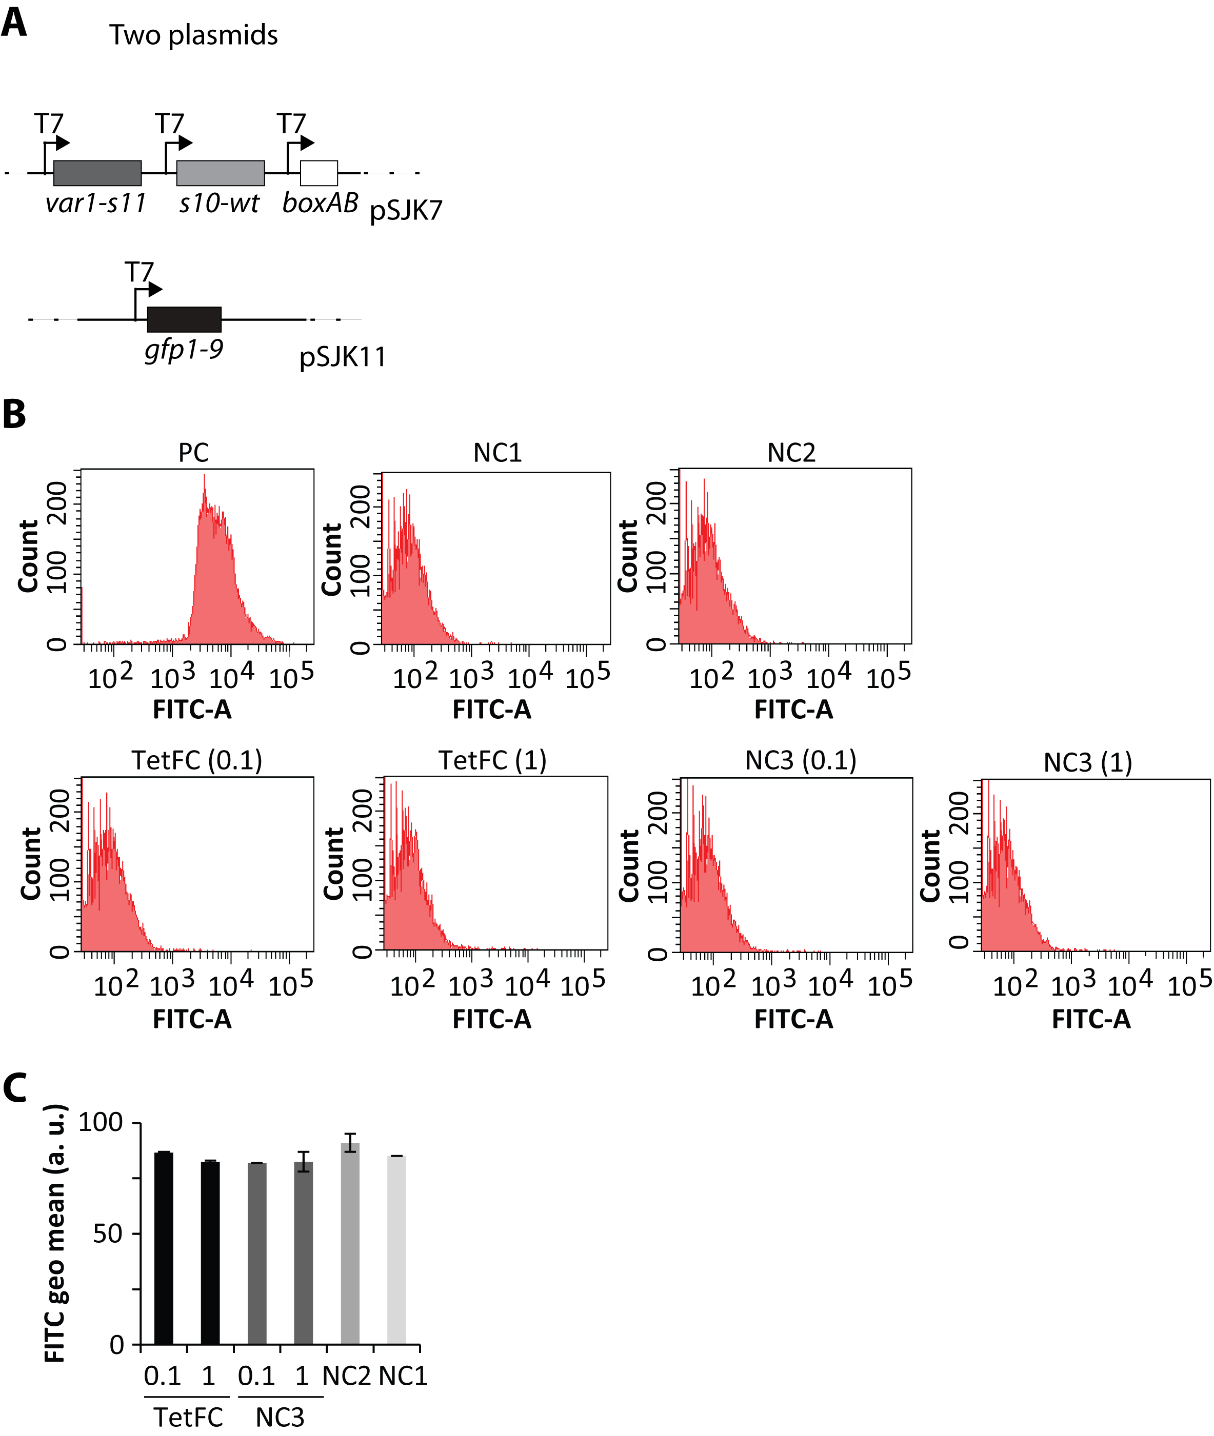


**Figure S5: Flow cytometric analysis of TetFC after plasmid-based production of GFP1-9. (A)** Overview of the expression system. A high copy number plasmid was used for *gfp1-9* under control of a T7 promoter (pSJK11) in addition to a plasmid containing *var1-S11*, *S10-WT* and *boxAB* under the control of three individual T7 promoters (pSJK7). **(B)** Histograms show the count of events with respect to their intensity of green fluorescence. **(C)** Geometric mean of green fluorescence. Average values of two independent experiments and range error bars are shown, range. (PC) BL21(DE3) pSJK9, (NC1) BL21(DE3), (NC2) BL21(DE3) pSJK11, (TetFC) BL21(DE3) pSJK11+7, (NC3) BL21(DE3) pSJK11+4, (0.1) 0.16 mM IPTG (0.1), (1) 1.6 mM IPTG. Cells were grown to OD600 = 0.4, and 0.16 mM or 1.6 mM IPTG were added before further cultivation at 17 °C for 17 h.


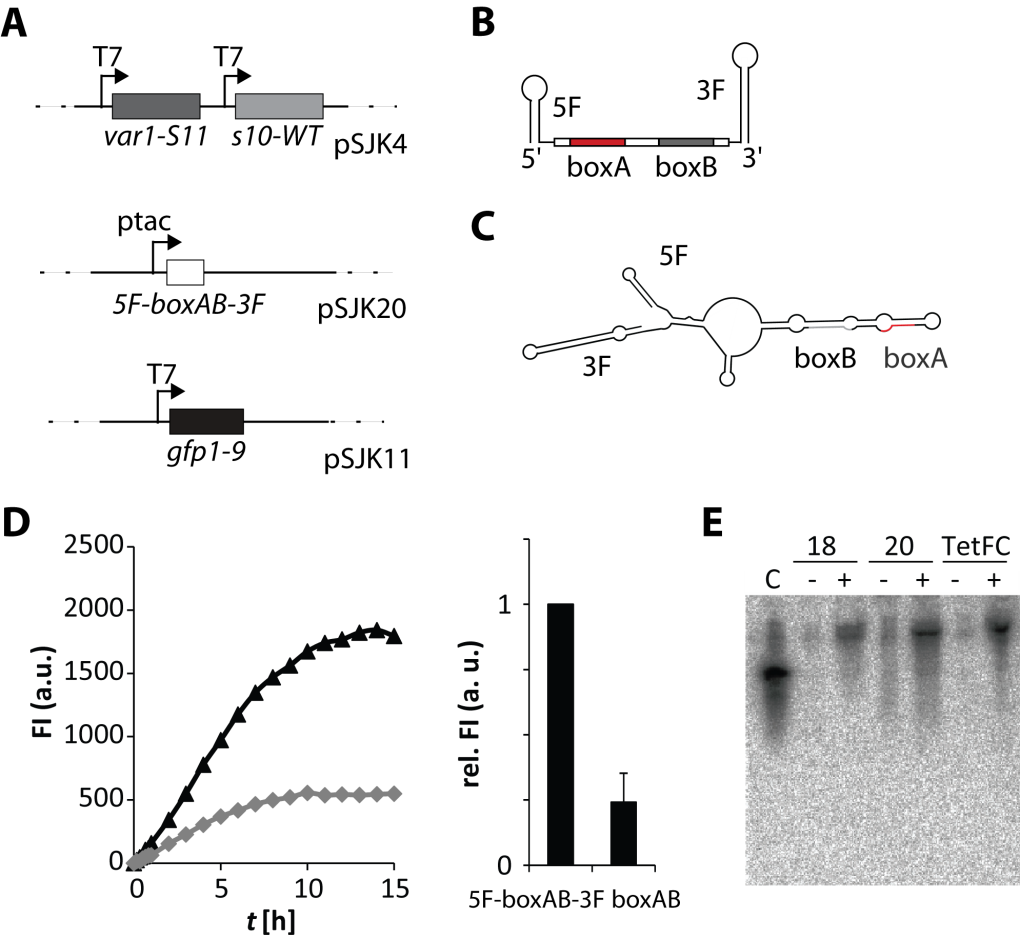


**Figure S6: Stabilization of target RNA boxAB. (A)** Overview of the expression system. Plasmid pSJK4 was used for dual production of S10-WT and Var1-S11. High-copy plasmid pSJK11 was used for production of GFP1-9. RNA boxAB was flanked by two stem loops and placed under the control of the p*tac* promoter (plasmid pSJK20). **(B)** Schematic representation of stabilized target RNA (5F-boxAB-3F). RNA boxAB, which consists of adjacent Pumilio binding motifs boxA and boxB, is flanked by stem loops at the 5’- (5F) and the 3’-end (3F), respectively. **(C)** Predicted structure of 5F-boxAB-3F using mfold web server ([Zuker, 2003](#_ENREF_13)). **(D)** Comparison of boxAB and 5F-boxAB-3F as target RNAs for TetFC. 5F-boxAB-3F (black triangles), boxAB (grey squares). (Left) Time-course of TetFC. The data represent mean fluorescence intensity (FI) values of one representative experiment performed in duplicate. (Right) Relative fluorescence intensities after 12 hours. Black bars represent standard deviation of three experiments performed in duplicate. **(E)** Northern blot with total RNA isolated from BL21-Gold(DE3)pSJK18 (18), BL21-Gold(DE3)pSJK20 (20) and BL21-Gold(DE3)pSJK11+20+4 cells (TetFC) and radioactively labelled boxAB probe. (C) Control construct of 80 nt. Samples were isolated before (-) and after (+) induction with 0.16 mM IPTG and cultivation at 37 °C for 3 h.


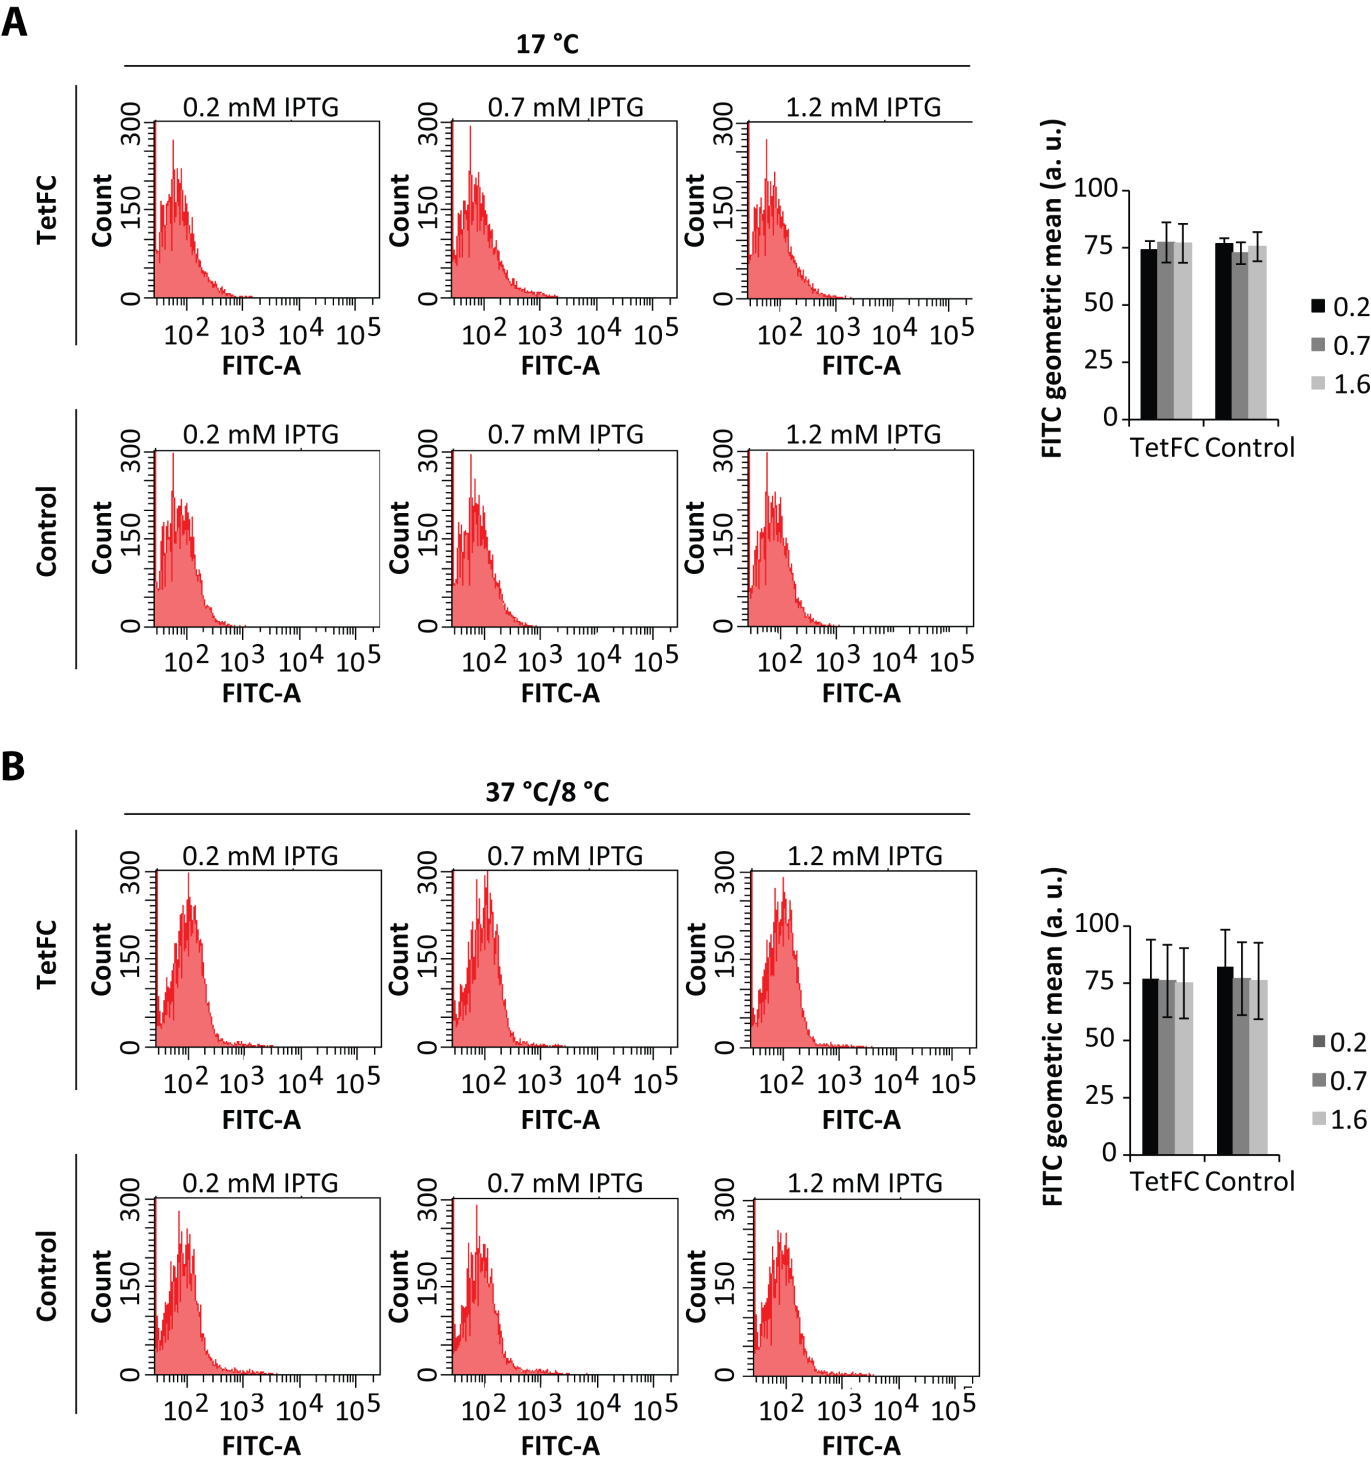


**Figure S7:** **Flow cytometric analysis of TetFC with stabilized RNA.** Cells were grown at **(A)** 17 °C for 15 h, or **(B)** 37 °C for 3 h and subsequent incubation at 8 °C for 12 h. (Left) Histograms show the count of events with respect to their intensity of green fluorescence. (Right) Geometric mean of green fluorescence from events shown on the left. For TetFC, *E. coli* cells containing plasmids pSJK11, pSJK20 and pSJK4 were used. The control cells contained the same plasmids, but pSJK20c for RNA 5F-boxAC-3F instead of 5F-boxAB-3F. Black bars indicate the standard deviation of two to five independent experiments.


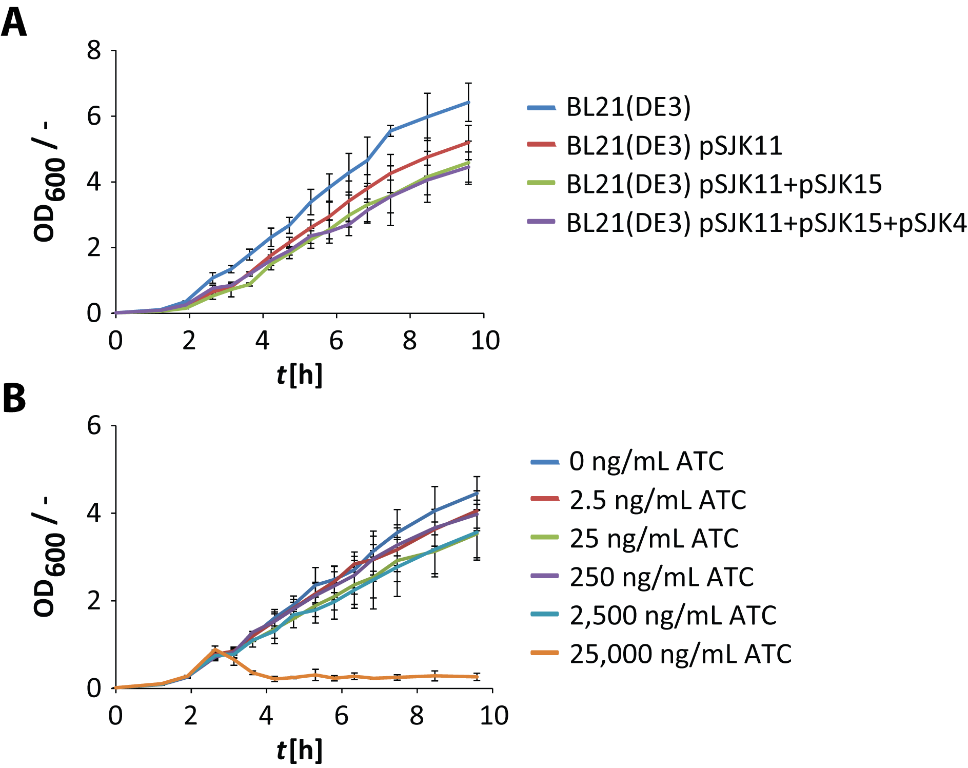


**Figure S8: Effect of ATC and number of plasmids on bacterial growth.** **(A)** Growth curves of *E. coli* BL21(DE3) (blue line), BL21(DE3) pSJK11 (red line), BL21(DE3) pSJK11+pSJK15 (green line) and BL21(DE3) pSJK11+pSJK15+pSJK4 cells (purple line). **(B)** Growth curves of *E. coli* BL21(DE3) pSJK11+pSJK15+pSJK4 cells in presence of 0-25,000 ATC ng/mL medium. Error bars indicate the standard deviation of three experiments performed in parallel.

**Material and Methods**

*Materials.*

*E. coli* BL21(DE3) cells were obtained from Novagen (Darmstadt, D) and *E. coli* BL21-Gold(DE3) cells were obtained from Agilent Technologies GmbH & Co. KG (Waldbronn, D).

Vector pET18b+ GFP1-9 was kindly provided by G. S. Waldo from Los Alamos National Labs ([Cabantous *et al.*, 2013](#_ENREF_2); [Waldo and Cabantous, 2010](#_ENREF_11)). The pTYB3 vectors containing the open reading frames encoding Pumilio WT and Pumilio Variant 1 (Var1, MUT6‑2/7‑2; N1043S/Q1047E/S1079N/E1083Q) proteins were a generous gift from C. G. Cheong and T. M. T. Hall ([Cheong and Hall, 2006](#_ENREF_3)). Plasmid pWH610L3F5F containing stem loops 5F: GGGAGACCACAACGGTTTCCC and 3F: TAGCATAACCCCTTGGGGCCTCTAAACGGGTCTTTGAGGGGTTTTTTGCCT as well as the p*tac* promoter was a kind gift of B. Süß ([Hunsicker *et al.*, 2009](#_ENREF_5)). Plasmid pMB38 was generously provided by N. E. Broude ([Valencia-Burton *et al.*, 2007](#_ENREF_10)). pSK17-Hb-boxAB was kindly provided by A. K. Rath.

Oligonucleotides were purchased from InvitrogenTM, Thermo Fisher Scientific. FastDigestTM restriction enzymes were obtained from Thermo Fisher Scientific Biosciences GmbH (St. Leon-Rot, D). For immobilized metal ion affinity chromatography, the ÄKTA purifier™ system was used in combination with HisTrap™ FF 1 columns (GE Healthcare, München, D). The software LabImage 1D L340 (Kapelan Bio-Imaging) was used for calculation of protein concentration after gel electrophoresis. For blotting experiments, the Semi-Dry Blotter V20-SDB (Scie-Plas, Cambridge, UK) was used. The qRT-PCRs were performed in a C1000 TouchTM Thermal Cycler (Bio-Rad Laboratories GmbH, München, D). *In vitro* fluorescence intensity measurements of BiFC and TetFC were performed in black microplates (384‑well, Greiner bio‑one) using Tecan Infinite® M1000 PRO (Tecan). *In vivo* analysis of TetFC as well as cell sorting was carried out using FACSAriaTM III.

ATC was purchased from IBA GmbH (Göttingen, D). All other chemicals were purchased from AppliChem GmbH (Darmstadt, D), Merck KGaA (Darmstadt, D), Sigma-Aldrich Chemie GmbH (Taufkirchen, D), Carl Roth GmbH & Co. KG (Karlsruhe, D) or VWR International GmbH (Darmstadt, D).

*Cloning of constructs*.

Plasmid pSJK1 contains the *gfp1-9* gene cassette to be inserted into the *E. coli* chromosome. The cassette was generated by using a series of assembly-PCRs. First, the sequence containing promoter 𝜆pL was generated by two individual PCRs (1: template LPL1 with oligonucleotides LPL1_fwd_fuse_FRT and LPL1_rev, 2: template LPL2 with oligonucleotides LPL2_fwd und LPL2_rev_fuse_GFP) and subsequent assembly-PCR. Gene *gfp1-9* was amplified using oligonucleotides GFP1-9_fwd_fuse_LPL and GFP1-9_rev_EcoRI, as well as plasmid pET18b+ GFP1-9 as a template. The PCR product, GFP1-9 was fused to 𝜆pL performing another assembly-PCR to yield construct 𝜆pL-GFP1-9. Additionally, *kanR* and the flanking FRT sites were amplified using template pKD4 ([Datsenko and Wanner, 2000](#_ENREF_4)) and oligonucleotides FRT-Kan-FRT_fwd_BamHI and FRT-Kan-FRT_rev_fuse_LPL_25. The resulting fragment was combined with 𝜆pL-GFP1-9 via a last assembly-PCR to give the final cloning casette FRT-*KanR*-FRT-𝜆pL-GFP1-9. This construct was inserted into pET22b+ using restriction enzymes BamHI and EcoRI and subsequent DNA ligation.

Homologous recombination was carried out using the protocol described by Datsenko and Wanner ([Datsenko and Wanner, 2000](#_ENREF_4)). The design of the cloning cassette containing *gfp1-9* was according to Pinheiro *et al*. ([Pinheiro *et al.*, 2008](#_ENREF_8)). Homologous regions necessary for integration of the cassette into the genome of *E. coli* BL21(DE3) were added via PCR using oligonucleotides HB-A1/HB-A2, HB-B1/HB-B2 und HB-C1/HB-C2. The resulting strains BL21(DE3) (Δ*rybA::FRT-KanR-FRT-gfp1-9*), BL21(DE3) (Δ*znuA::FRT-KanR-FRT-gfp1-9*) and BL21(DE3) (283526-284439 *FRT-KanR-FRT-gfp1-9* were termed ACR001, ACR002 and ACR003, respectively.

Cloning of construct Pum-S10-S11 (plasmid pSJK2) was described before ([Rath *et al.*, 2014](#_ENREF_9)).

Plasmid pSJK4 was obtained by inserting construct Var1-S11 into the first, and S10-WT into the second multiple cloning site of pMB38 ([Valencia-Burton *et al.*, 2007](#_ENREF_10)). For this, Var1-S11 was amplified using His6_fwd_Mut_NcoI and S11_rev_NotI as well as template pET16b+ Pum-Var1-S11 ([Kellermann *et al.*, 2013](#_ENREF_6)). The resulting fragment was cleaved using NcoI and NotI and subsequently inserted into pMB38 using T4 DNA ligase, yielding plasmid pSJK3. S10-WT was amplified using oligonucleotides S10_fwd_NdeI and His6_rev_Mut_XhoI and pET22b+ S10-Pum-WT ([Kellermann *et al.*, 2013](#_ENREF_6)) as template and inserted into pSJK3 using restriction enzymes NdeI and XhoI. The resulting plasmid was termed pSJK4.

Plasmid pSJK11 was obtained by inserting *gfp1-9* from pET18b+ GFP1-9 into pUC19-T using BamHI and EcoRI restriction sites.

For the *in vivo* application of TetFC the former 35 nt boxAB RNA ([Kellermann *et al.*, 2013](#_ENREF_6)) was extended to a length of 120 nt in context of the natural sequence of the hunchback 3’-UTR (plasmid pSK17-Hb-boxAB). For the two plasmid-based approach, this construct was integrated into pSJK4. The respective insert containing boxAB was generated by PCR using oligonucleotides boxAB_fwd_XhoI_T7_prom and boxAB_rev_XhoI and plasmid pSK17-Hb-boxAB as template. Using restriction enzyme XhoI, the construct containing boxAB under control of a third T7 promoter was inserted into pSJK4 to yield plasmid pSJK7.

For stabilization of target RNA boxAB, the respective sequence was first cloned into plasmid pWH610L3F5F containing the DNA sequence for two stem loop structures, 3F and 5F ([Hunsicker *et al.*, 2009](#_ENREF_5)) using oligonucleotides boxAB_fwd_XbaI and boxAB_rev_BglII as well as restriction enzymes XbaI and BglII. The resulting plasmid pSJK18 was used as a template for a QuikChange®-PCR using CCC_QS_fwd and CCC_QS_rev as primer to create plasmid pSJK18c. pSJK18c contains boxCB instead of boxAB. Digestion of pSJK18 and pSJK18c using EcoRI and NcoI resulted in fragments containing boxAB or boxAC flanked by two stem loops and under control of promoter p*tac*. Insertion of these inserts into pRSFDuetTM-1 using the same restriction sites yielded plasmids pSJK20 and pSJK20c, respectively.

To enable target RNA production independent of the recombinant production of fusion proteins S10-WT and Var1-S11 as well as GFP1-9, the respective sequence as well as *tetR* and TetR binding sites tetO2 were cloned into plasmid pACYCDuetTM-1 (backbone of pMB38). Amplification of *tetR* was carried out using plasmid pTet-SpecR and oligonucleotides tetR_fwd_NdeI and tetR_rev_XhoI. Subsequent integration into pRSFDuetTM-1 was done using restriction enzymes NdeI and XhoI and yielded plasmid pSJK13. Using oligonucleotides boxAB_fwd_NcoI und boxAB_rev_Term_EcoRI and plasmid pSJK7 as template, the insert for boxA was created. After digestion with restriction enzymes EcoRI und NcoI it was inserted into pSJK13, resulting in plasmid pSJK14. Oligonucleotides pRSF_fwd_BamHI and pRSF_rev_BamHI were applied in another PCR to linearize pSJK14 and add terminal BamHI restriction sites. Insert tetO2 was created by PCR using tetO_fwd_BamHI and tetO_rev_BamHI as well as oligonucleotide 2xtetO2_revcomp as template. Digestion of both fragments using restriction enzyme BamHI and subsequent DNA ligation resulted in plasmid pSJK15.

*Recombinant protein production and protein purification.*

Pumilio fusion proteins and GFP1-9 were produced in *E. coli* BL21(DE3) cells and purified as previously described ([Kellermann *et al.*, 2013](#_ENREF_6)). GFP1-9 concentration was measured according to Bradford ([Bradford, 1976](#_ENREF_1)) using Roti®-Quant and bovine serum albumin as a standard. Concentration of Pumilio fusion proteins was determined analogously and additionally verified using gel electrophoresis and Coomassie-staining.

*Western blotting.*

For Western blotting experiments, samples were first electrophoretically separated in 10 % polyacrylamide-gels and subsequently transferred onto a nitrocellulose membrane. Penta His-IgG, produced in mice (Sigma-Aldrich Chemie GmbH, Taufkirchen, D) was used as primary antibody and anti-mouse IgG (alkaline phosphatase, 5 PRIME GmbH, Hamburg, D) was applied as secondary antibody.

*Northern blotting.*

For Northern blotting experiments, 10 µg total RNA isolated from respective *E. coli* cells were electrophoretically separated in a denaturating 10 % polyacrylamid gel. Quality of total RNA was verified for each experiment via ethidiumbromide-staining. In a next step, the RNA was transferred onto a positively charged nylon membrane. Crosslinking of RNA to the membrane was achieved by exposing the sample to UV light for 1.5 min. Samples were rotated at 65 °C for 1 h in 10 mL Roti®-Hybri-Quick und 0.1 mg/mL salmon sperm DNA. Radioactively labeled probes were synthesized using the AmershamTM MegaprimeTM DNA Labeling System (GE Healthcare, München, D) and 32P-α-CTP (HARTMANN ANALYTIC GmbH, Braunschweig, D) and incubated with the samples for 17-19 h at 42 °C. Membranes were washed for 10-20 min with 2 x SSC, 0.1 % (*w*/*v*) SDS, then 1 x SSC, 0.1 % (*w*/*v*) SDS und finally with 0.5 SSC, 0.1 % (*w*/*v*) SDS. Signals were measured after 20 h using Phosphorimager BAS-1800 II (FUJIFILM Europe GmbH, Düsseldorf, D) and analyzed using AIDA 2.43 (Elysia-raytest GmbH, Straubenhardt, D).

*qRT-PCR.*

First, cDNA was produced from total RNA using Maxima H Minus Reverse Transkriptase (Thermo Fisher Scientific Biosciences GmbH, St. Leon-Rot, D) using oligonucleotides hb-boxAB_rev and IdnT_rev. Subsequent quantitative Real-Time PCRs were perfomed with iTaq™ universal SYBR® Green supermix (Bio-Rad Laboratories GmbH, München, D) using a combination of hb-boxAB_fwd/hb-boxAB_rev or IdnT_fwd/IdnT_rev. As a reference gene, *IdnT* was used, as it has been described as a stably expressed gene over a wide range of different conditions in *E. coli* ([Zhou *et al.*, 2011](#_ENREF_12)). Data were analyzed using *CFX Manager*TM(Bio-Rad Laboratories GmbH, München, D).

*Fluorescence complementation in vitro.*

*In vitro* measurements of BiFC and TetFC were carried out using *Tecan Infinite® M1000 PRO* and the following settings: *λ*ex = 488 nm, 9 nm band width, *λ*em = 530 nm, 20 nm band width, gain = 129, z‑position = 16000 µm, number of flashes = 50, 400 Hz. For BiFC, Pum-S10-S11 was added to the respective lysate to reach a final concentration of 250 nM. For TetFC, RNA and Pumilio fusion proteins were pre-mixed in black 384 well plates and incubated at 22 °C for 30 min. After adding GFP1-9, fluorescence was measured for up to 15 h. For endpoint measurements only, values from *t*= 0 were subtracted from the final value, to account for any background fluorescence.

*Fluorescence complementation in vivo.*

*E. coli* cells were consecutively transformed with the respective plasmids and cultivated at 37 °C, 220 rpm for 14 h. Medium of cells containing plasmids pSJK11 was supplemented with 100 µg ampicillin/mL medium. Furthermore, 34 µg chloramphenicol/mL medium was added for cells containing plasmids pSJK4 or pSJK7. Similarly, 25 µg kanamycin/mL medium was used for cells containing plasmids pSKJ15, pSJK20, or pSJK20c.

Main cultures were cultivated at 37 °C, 220 rpm to reach an optical density of OD600 = 0.4 before adding IPTG. Depending on the expression system, cells were cultivated at different temperatures and varying concentrations of IPTG were applied. For the two-step induction of TetFC component production, 0.16 mM IPTG was added and cells were first incubated at 37 °C for 2 h, before 2.5-2.5 x 105 ng ATC/mL medium was added for 1.5 h at 37 °C and cells were finally incubated at 8 °C for 12 h (Figure 3). For the two plasmid-based approach 0.16 mM or 1.6 mM IPTG were added before cultivation at 17 °C for 17 h (Figure S5). Induction of production of stabilized RNA was achieved by adding 0.16 mM IPTG and subsequent incubation at 17 °C for 15 h, or at 37 °C for 3 h and subsequent incubation at 8 °C for 12 h (Figure S7).

*Flow cytometry and FACS.*

TetFC *in vivo* was analyzed using flow cytometry. Cells were washed twice in PBS and analyzed using FACSAriaTM III (70 µm nozzle, *λ*ex = 488 nm, *λ*em = 530 nm (30 nm band width), SSC: 308, FSC: 176, FITC: 610, threshold: 1200, flow rate: 1-8, event rate: 50-200 1/s, mind. 10000 events). Gates and SSC/FSC/FITC settings were chosen based on a negative control without any plasmids, and a positive control producing whole-split GFP, a previously described variant containing amino acid substitutions of all three split-GFP fragments (pSJK9, ([Kellermann and Rentmeister, 2016](#_ENREF_7)). Using parameters SSC/FSC a first gate for *E. coli* cells in general was set. Events from this gate were subsequently analyzed with respect to their green fluorescence (FITC channel). For FACS, an equal number of TetFC and control cells were mixed and at least 500-1100 events of the highest fluorescence intensity (0.1-0.5 %) were collected into LB medium containing 100 ng/mL ampicillin. The sort was performed using the settings „two-way-sort“ and „yield“. After incubation at 37 °C for 30 min, 34 ng/mL chloramphenicol was added and cells were cultivated for another 12 h.

To identify positives colonies after FACS, single colonies (mind. 120-160) were tested for a kanamycin resistance.

Table 1: Oligonucleotides used in this study

| **Name** | **Sequence (5'->3')** | **Template** | **Purpose/**  **Cloning** |
| --- | --- | --- | --- |
| 2xtetO2_ORF_revcomp | CTGGCGTTCAATGATCGGATCCTCTCTATCACTGATAGGGATGTCAATCTCTATCACTGATAGGGAGGGCCTAACAGTGGATCTCTCTATCACTGATAGGGATGTCAATCTCTATCACTGATAGGGAGGATCCATGATCGCTCAGCG | - | pSJK15 |
| A1_fwd | CCACTCTTCACGCACTCTTG | *E. coli* BL21(DE3) ACR001 | Colony-PCR |
| B1_fwd | TAATAATTTACCGCGACCACACCG | *E. coli* BL21(DE3) ACR002 | Colony-PCR |
| boxAB_fwd_ XbaI | GACTAGTCTAGACCCATCACCATCACCTTGTTATTATTA | hb-boxAB | pSJK20 |
| boxAB_fwd_NcoI | TAGATCCCATGGGAGCTCCCCATCACCATCACC | pSJK7 | pSJK15 |
| boxAB_fwd_XhoI_EcoRI _T7prom_SacI | TAGATCCTCGAGTCTGGTAAGAATTCTAATACGACTCACTATAGAGCTCCCCATCACCATCACCTTGTTATT | boxAB | pSJK7 |
| boxAB_fwd_XhoI_EcoRI _T7prom_SacI | TAGATCCTCGAGTCTGGTAAGAATTCTAATACGACTCACTATAGAGCTCCCCATCACCATCACCTTGTTATT | boxAB/boxCB (aus pSK17) | pSJK7 |
| boxAB_rev_BglII | TCGATCAGATCTGACAACAAAATAATGTTTGGAAAACTTATGC | hb-boxAB | pSJK20 |
| boxAB_rev_Term_EcoRI_lang | GATCTAGAATTCCAAAAAACCCCTCAAGACCCGTTTAGA | pSJK7 | pSJK15 |
| boxAB_rev_XhoI | GATCTACTCGAGGACAACAAAATAATGTTTGGAAAACT | boxAB | pSJK7 |
| boxAB_rev_XhoI | GATCTACTCGAGGACAACAAAATAATGTTTGGAAAACT | boxAB/boxCB (aus pSK17) | pSJK7 |
| C1_fwd | CCAATTTTTTGACATGTATCACAAATTTGAA | *E. coli* BL21(DE3) ACR003 | Colony-PCR |
| CCC_QS_fwd | TAATCCCAGAATTGTATATATTAATCCCATATATTCGTAGCATAAGTTTTCCA | hb-boxAB | pSJK20c |
| CCC_QS_rev | TGGAAAACTTATGCTACGAATATATGGGATTAATATATACAATTCTGGGATTA | hb-boxAB | pSJK20c |
| FRT-Kan-FRT_fwd_BamHI | GATATGGATCCGTGTAGGCTGGAGCTGCTT | pKD4 | pSJK1 |
| FRT-Kan-FRT_rev_fuse_LPL_25 | ATTGTTTGGTAGGTGAGAGATCCCCCATATGAATATCCTCCTTAGTTCCT | pKD4 | pSJK1 |
| GFP1-9_fwd_fuse_LPL | TAATTTACCAACACTACTACGTTTTAACTGAAACAAACTGGAGACTGCCATGAGGAAAGGAGAAGAACTTTTCA | GFP1-9 | pSJK1 |
| GFP1-9_fwd_XbaI | GATCTCTAGAATGAGGAAAGGAGAAGAACTTTTCA | GFP1-9 | pSJK11 |
| GFP1-9_rev_EcoRI | AGCTGAATTCTTATGGTAAAAGGACAGGGCCA | GFP1-9 | pSJK1 |
| HB-A1 | AAAGGGGTCCGCATCCGCGAGCCGCAATATACGCAGGGCTGCAAGAAGATGTGTAGGCTGGAGCTGCTT | pSJK1 | *E. coli* BL21(DE3) ACR001 |
| HB-A2 | GCGAAGGTACAAAAAATTAACGTTTTAGCAATAGCTATATAATATAGCCTTTATGGTAAAAGGACAGGGCCA | pSJK1 | *E. coli* BL21(DE3) ACR001 |
| HB-B1 | AACGCCAGGGCGACAGAGCGGGCTATCTGTTGCACGTAATCACTTCCTCAGTGTAGGCTGGAGCTGCTT | pSJK1 | *E. coli* BL21(DE3) ACR002 |
| HB-B2 | AATGTTATAATATCACACTTCTCATATTCATTACGATTATTGGTCGCATTTTATGGTAAAAGGACAGGGCCA | pSJK1 | *E. coli* BL21(DE3) ACR001 |
| HB-C1 | TAGATGTATTACATCAACTATCTTTTATTGCACCAACGTCATTGATATATGTGTAGGCTGGAGCTGCTT | pSJK1 | *E. coli* BL21(DE3) ACR003 |
| HB-C2 | CAGAAAAGGAAATACCTTTATGTAAGAAAGTGCACCACCACCTAATATATTTATGGTAAAAGGACAGGGCCA | pSJK1 | *E. coli* BL21(DE3) ACR003 |
| hb-boxAB_fwd | GTTTGGAAAACTTATGCTACG | hb-boxAB | qRT-PCR |
| hb-boxAB_rev | CCCATCACCATCACCTTG | hb-boxAB | qRT-PCR |
| His6_fwd_Mut_NcoI | AGCTCCATGGGCCATCATCATCATCATCATCATCATCATCACAGCAGCGGCCATATCGAAGGTCGTCACATGGGCCGCAG | Var1-S11 | pSJK4 |
| His6_rev_Mut_XhoI | AGCTCTCGAGTCAGTGGTGGTGGTGGTGGTGTTGCAGCCCTAAGTCAACACCGTTC | S10-WT | pSJK4 |
| IdnT_rev | ACAAACGGCGGCGATAGC | *E. coli* | qRT-PCR |
| ldnT_fwd | CTGTTTAGCGAAGAGGAGATGC | *E. coli* | qRT-PCR |
| LPL1 | ATGCCCCCCTGCAAAAAATAAATTCATATAAAAAACATACAGATAACCATCTGCGGTGATAAATTATCTCTGGCGGTGTT | - | pSJK1 |
| LPL1_fwd_fuse_FRT | GGGGATCTCTCACCTACCAAACAATGCCCCCCTGCAAAAAATAAATT | LPL1 | pSJK1 |
| LPL1_rev | CTCAGTATCACCGCCAGTGGTATTTATGTCAACACCGCCAGAGATAATTTATCA | LPL1 | pSJK1 |
| LPL2 | GGACGCACTGACCACCATGAAGGTGACGCTCTTAAAAATTAAGCCCTGAAGAAGGGCAGCATTCAAAGCAGAAGGCTTTG | - | pSJK1 |
| LPL2_fwd | CACTGGCGGTGATACTGAGCACATCAGCAGGACGCACTGACCACCAT | LPL2 | pSJK1 |
| LPL2_rev_fuse_GFP | TTAAAACGTAGTAGTGTTGGTAAATTAGCGCCAATGCTTCGTTTCGTATCACACACCCCAAAGCCTTCTGCTTTGAATGC | LPL2 | pSJK1 |
| MCS1_fwd | TGCGACTCCTGCATTAGGAAAT | pACYCDuetTM-1, pMB38 | Colony-PCR |
| MCS1_rev | ATCTCCTTCTTATACTTAACTAATATACTA | pACYCDuetTM-1, pMB38 | Colony-PCR |
| MCS2_fwd | CACGGCCGCATAATCGAAATTAATA | pACYCDuetTM-1, pMB38 | Colony-PCR |
| MCS2_rev | TGCTCAGCGGTGGCAGCA | pACYCDuetTM-1, pMB38 | Colony-PCR |
| pET22b+_rev | GCTCAGCGGTGGCAGCAGC | pET22b+ | Colony-PCR |
| pRSF_fwd_BamHI | GATCATGGATCCTGTAGAAATAATTTTGTTTAACTTTAATAAGGAG | pSJK14, pSJK20 | pSJK15 |
| pRSF_rev_BamHI | ATGATCGGATCCTATAGTGAGTCGTATTAATTTCCTAATGCA | pSJK14 | pSJK15 |
| pUC19-T_fwd | TGT GTG GAA TTG TGA GCG GAT A | pUC19-T | Colony-PCR |
| Pum_NdeI_fwd | AGCTCATATGGGCCGCAGCCGCC | Pum | pSJK2 |
| Pum_rev_fuse_x | ACCGCCAGACCCAACGTCGGTACC CCCTAAGTCAACACCGTTCTTCA | Pum | pSJK2 |
| S10_fwd_fuse_x | GACGTTGGGTCTGGCGGTGGCTCC ATGGATTTACCAGACGACCATTACCT | S10 | pSJK2 |
| S10_fwd_NdeI | GATATCATATGGATTTACCAGACGACCA | S10-WT | pSJK4 |
| S10_rev_fuse_S11 | AGGACCATGTGGTCACGCTTTTCGTTGAGATCTTTCGAAAGGATAGTTT | S10 | pSJK2 |
| S11_fwd_SK | AAGCGTGACCACATGGTCCT | S11 | pSJK2 |
| S11_rev_NotI | AGCTGCGGCCGCTTAGCTAGCATCTGTAATCCCAG | Var1-S11 | pSJK4 |
| S11_rev_XhoI | AGCTCTCGAGTTAGCTAGCATCTGTAATCCCAGC | S11 | pSJK2 |
| tetO_fwd_BamHI | GATCATGGATCCTCCCTATCAGTG | tetO | pSJK15 |
| tetO_rev_BamHI | ATGATCGGATCCTCTCTATCACTG | tetO | pSJK15 |
| tetR_fwd_NdeI | GATCATCATATGTGCGGGACTCTGGGGTTCG | TetR | pSJK15 |
| TetR_rev_XhoI | ATGATCCTCGAGTTAAGACCCACTTTCACATTTAAGTTGTTTT | TetR | pSJK15 |

Table 2: Table of RNAs used for *in vitro* experiments.

| **Name** | **Sequence (5'->3')** |
| --- | --- |
| boxAB | GGGCCAGAAUUGUAUAUAUUAAUUUGAUAUAUUCG |
| 5F-boxAB-3F | GGGAGACCACAACGGUUUCCCUCUAGACCCAUCACCAUCACCUUGUUAUUAUUAUUUAUCACUAUUAUCAUAUAAUCCCAGAAUUGUAUAUAUUAAUUUGAUAUAUUCGUAGCAUAAGUUUUCCAAACAUUAUUUUGUUGUCAGAUCUUAGCAUAACCCCUUGGGGCCUCUAAACGGGUCUUGAGGGGUUUUUUGCUCCAUGGUAUAUCUCCUUAUUAAAGUUAAACAAAAUUAUUUCUACAGGAUCCAUGAUC |

**References**

Bradford, M. M. (1976). A rapid and sensitive method for the quantitation of microgram quantities of protein utilizing the principle of protein-dye binding. Anal. Biochem. *72*, 248-254.

Cabantous, S., Nguyen, H. B., Pedelacq, J. D., Koraichi, F., Chaudhary, A., Ganguly, K., Lockard, M. A., Favre, G., Terwilliger, T. C., and Waldo, G. S. (2013). A new protein-protein interaction sensor based on tripartite split-GFP association. Sci. Rep. *3*, 2854.

Cheong, C. G., and Hall, T. M. (2006). Engineering RNA sequence specificity of Pumilio repeats. Proc. Natl. Acad. Sci. U S A *103*, 13635-13639.

Datsenko, K. A., and Wanner, B. L. (2000). One-step inactivation of chromosomal genes in Escherichia coli K-12 using PCR products. Proc. Natl. Acad. Sci. U S A *97*, 6640-6645.

Hunsicker, A., Steber, M., Mayer, G., Meitert, J., Klotzsche, M., Blind, M., Hillen, W., Berens, C., and Suess, B. (2009). An RNA aptamer that induces transcription. Chem. Biol. *16*, 173-180.

Kellermann, S. J., Rath, A. K., and Rentmeister, A. (2013). Tetramolecular fluorescence complementation for detection of specific RNAs in vitro. Chembiochem *14*, 200-204.

Kellermann, S. J., and Rentmeister, A. (2016). A genetically encodable system for sequence-specific detection of RNAs in two colors. Chembiochem *17*, 895-899.

Pinheiro, L. B., Gibbs, M. D., Vesey, G., Smith, J. J., and Bergquist, P. L. (2008). Fluorescent reference strains of bacteria by chromosomal integration of a modified green fluorescent protein gene. Appl. Microbiol. Biotechnol. *77*, 1287-1295.

Rath, A. K., Kellermann, S. J., and Rentmeister, A. (2014). Programmable design of functional ribonucleoprotein complexes. Chem. Asian J. *9*, 2045-2051.

Valencia-Burton, M., McCullough, R. M., Cantor, C. R., and Broude, N. E. (2007). RNA visualization in live bacterial cells using fluorescent protein complementation. Nat. Methods *4*, 421-427.

Waldo, G. S., and Cabantous, S. (2010). USA Patent No. 7666606 B2. Los Alamos National Security, LLC, Los Alamos, NM (US), USA.

Zhou, K., Zhou, L., Lim, Q., Zou, R., Stephanopoulos, G., and Too, H. P. (2011). Novel reference genes for quantifying transcriptional responses of Escherichia coli to protein overexpression by quantitative PCR. BMC Mol. Biol. *12*, 18.

Zuker, M. (2003). Mfold web server for nucleic acid folding and hybridization prediction. Nucleic Acids Res. *31*, 3406-3415.
